# Supplementary material for: Ambulatory daytime blood pressure versus tonometric blood pressure measurements in the laboratory: effect of posture
Source: PubMed Central journal article supplement (PMC10309093; doi:10.1097/mbp.0000000000000651), 2023-06-08
Supplement: bpmj-28-199-s001.pdf [file bpmj-28-199-s001.pdf]

**Supplementary Table S1.** Number of subjects using antihypertensive agents and other medications.

| Antihypertensive medications             | Number of subjects |
|------------------------------------------|--------------------|
| Calcium channel blockers                 | 83                 |
| Beta blockers                            | 75                 |
| Angiotensin II receptor blockers         | 68                 |
| Thiazide diuretics                       | 60                 |
| Angiotensin converting enzyme inhibitors | 45                 |
| Potassium sparing diuretics              | 21                 |
| Prazocin                                 | 17                 |
| Moxonidine                               | 9                  |
| Furosemide                               | 7                  |
| Beta + alpha blockers                    | 3                  |
| Minoxidil                                | 1                  |
| Other medications                        | Number of subjects |
| Vitamin D                                | 64                 |
| Low acetylsalicylic acid                 | 49                 |
| Antidepressant                           | 36                 |
| Female hormones                          | 35                 |
| Metformin                                | 23                 |
| Proton pump inhibitor                    | 22                 |
| Calcium supplement                       | 22                 |
| Thyroxin*                                | 22                 |
| Potassium supplement                     | 18                 |
| Inhaled corticosteroids                  | 17                 |
| Antihistamine                            | 13                 |
| Tamsulosin or alfuzosin                  | 13                 |
| Antirheumatic drugs                      | 11                 |
| Insulin                                  | 10                 |
| Inhaled long-acting beta-agonist         | 9                  |
| Magnesium supplement                     | 9                  |
| Oral anticoagulants                      | 8                  |
| Benzodiazepine                           | 7                  |
| Dipeptidyl peptidase-4 inhibitor         | 7                  |
| Allopurinol                              | 7                  |
| Gabapentin or pregabalin                 | 6                  |
| 5-alpha reductase inhibitor              | 6                  |
| Intrauterine device                      | 5                  |
| Nonsteroidal anti-inflammatory drug      | 5                  |
| Glaucoma medication                      | 4                  |

|                                           |   |
|-------------------------------------------|---|
| Ezetimibe                                 | 3 |
| Glucagon-like peptide-1 agonist           | 3 |
| Antiepileptic                             | 3 |
| Opioid                                    | 3 |
| Sulphonyl urea                            | 2 |
| Triiodothyronine                          | 2 |
| Quetiapine                                | 2 |
| Clopidogrel                               | 2 |
| Fibrate                                   | 1 |
| Sodium-glucose co-transporter-2 inhibitor | 1 |
| Amiodarone                                | 1 |
| Oxybutynin                                | 1 |
| Letrozole                                 | 1 |
| Hydroxycarbamide                          | 1 |
| Dipyridamole                              | 1 |
| Aripiprazole                              | 1 |
| Levomepromazine                           | 1 |
| Pramipexol                                | 1 |
| Prednisolone                              | 1 |

---

\*All subjects were euthyroid
